# Supplementary material for: Mucus-Activatable Shiga Toxin Genotype stx2d in Escherichia coli O157:H7
Source: PubMed Central journal article supplement (PMC5547771; doi:10.3201/eid2308.170570), 2017-08
Supplement: 17-0570-Techapp-s1.pdf [file 17-0570-Techapp-s1.pdf]

# Mucus-Activatable Shiga Toxin Genotype *stx2d* in *Escherichia coli* O157:H7

## Technical Appendix

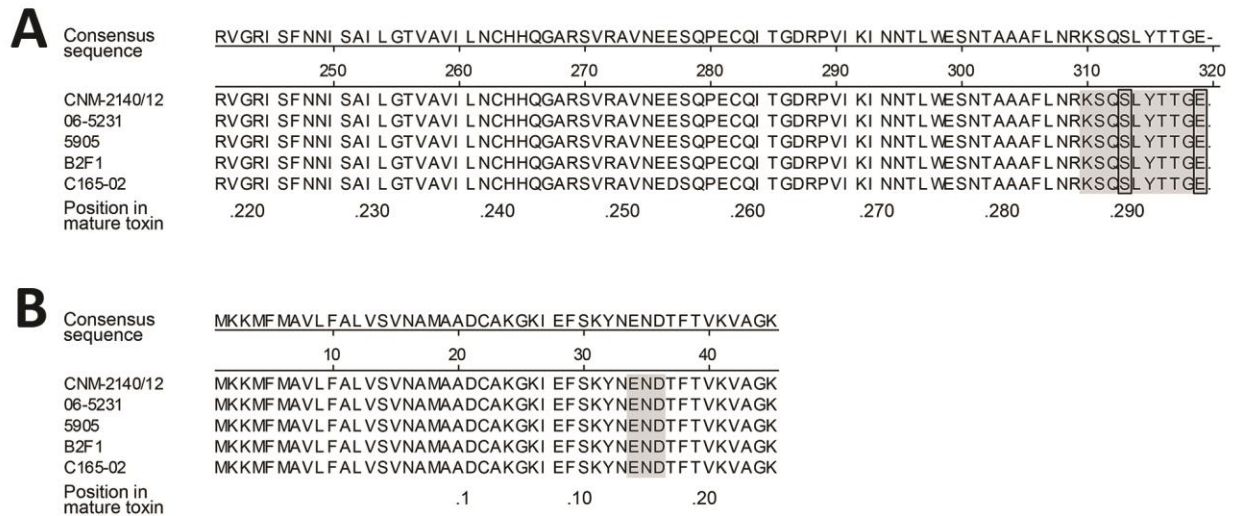

**Technical Appendix Figure.** Alignment with reference strains 06–5231, 5905, C165–02, and B2F1 of the amino acid sequences of the C-terminal end of the A subunit (A) and the N-terminal end of the B subunit (B) of the *stx2d*-positive Shiga toxin-producing *Escherichia coli* O157:H7 strain CNM-2140/12. Serine (S) at position 291 and glutamic acid (E) at position 297 in the mature toxin defining the activatable tail are included in boxes. Motifs that combined could determine the activatable property of Stx2d are gray shaded.
